# Supplementary material for: Evolution of MicroRNA Genes in Oryza sativa and Arabidopsis thaliana: An Update of the Inverted Duplication Model
Source: PLoS One. 2011 Dec 14;6(12):e28073. doi: 10.1371/journal.pone.0028073 (PMC3237417; doi:10.1371/journal.pone.0028073)

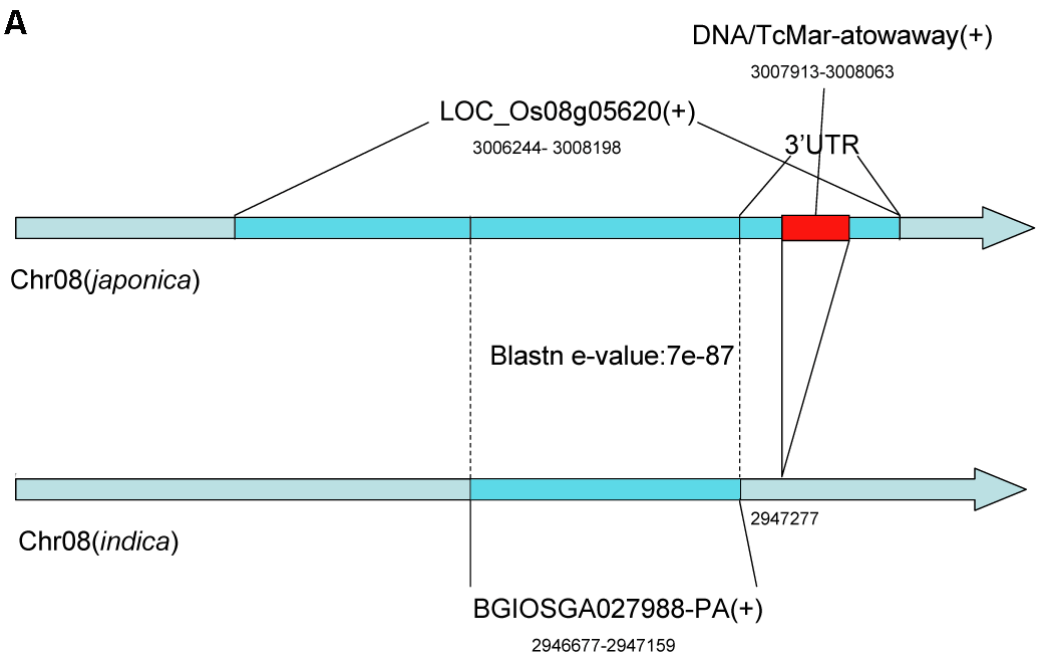

**B**

p>LOC\_Os08g05620.1|13108.m00554|cDNA cytochrome P450, pu\_(1955 nt)  
rev-comp initn: 560 initl: 560 opt: 603 Z-score: 450.1 bits: 93.3 E(): 8.4e-19  
85.119% identity (85.629% ungapped) in 168 nt overlap (168-2:1661-1828)

```

170      160      150      140
osa-M-      GTTCAAGTTCTATATACCTCCCTCGTTTCACAATGTA
              : : : : : : : : : : : : : : : : : :
LOC_Os      TAGGTCATGCGTTCTCTTTGCTAATCATGCTACTAATTACTCTCCCTCGTTTCACAATGTA
              1640      1650      1660      1670      1680      1690

130      120      110      100      90      80
osa-M-      AGTTATTCTACGATTCCCATATTCATATTCATGCTTAATAAACTAGACATATATATCTA
              : : : : : : : : : : : : : : : : : :
LOC_Os      AGTCATTCTGCGATTTCATATTCATATTCATGCTTAACGAATCTAGACATATATATCTA
              1700      1710      1720      1730      1740      1750

70       60       50       40       30       20
osa-M-      TATAGATTCAATTAACATCAATATAAATGTGGAAATTTTATAATGACTTACACTGTGAAA
              : : : : : : : : : : : : : : : : : :
LOC_Os      TCTAGATTCAATTAACATTAATGAATATGGAAATGTTAGAAATGACTTACATTGTGAAA
              1760      1770      1780      1790      1800      1810

10
osa-M-      C-AAAGGAAGTACATATTT
              : : : : : : : :
LOC_Os      CTGGAAGGAAGTACCAATTAATAAATGCTGATTAGATTAAAGTTCTCTTTGCTTTTGGG
              1820      1830      1840      1850      1860      1870

```

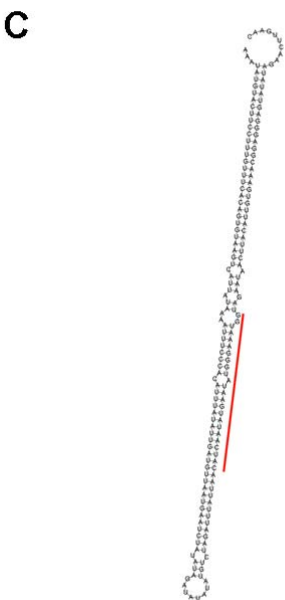

Supplement: Figure S3 — Schematic figure of osa-MIR446 and its target. (A) osa-MIR446's target on LOC_Os08g05620 in the japonica genome and ortholous regions in the indica genome. (B) FASTA alignments of osa-MIR446 and LOC_Os08g05620. Red regions represent MITE, while blue regions represent mature miRNA sequence and its target sequence. (C) Predicted fold-back structure of osa-MIR446 precursors. Red line represents mature miRNA sequence. (PDF) [file pone.0028073.s003.pdf]
