# Supplementary material for: Evolution of MicroRNA Genes in Oryza sativa and Arabidopsis thaliana: An Update of the Inverted Duplication Model
Source: PubMed Central journal article supplement (PMC3237417; doi:10.1371/journal.pone.0028073), 2011-12-14

**A**

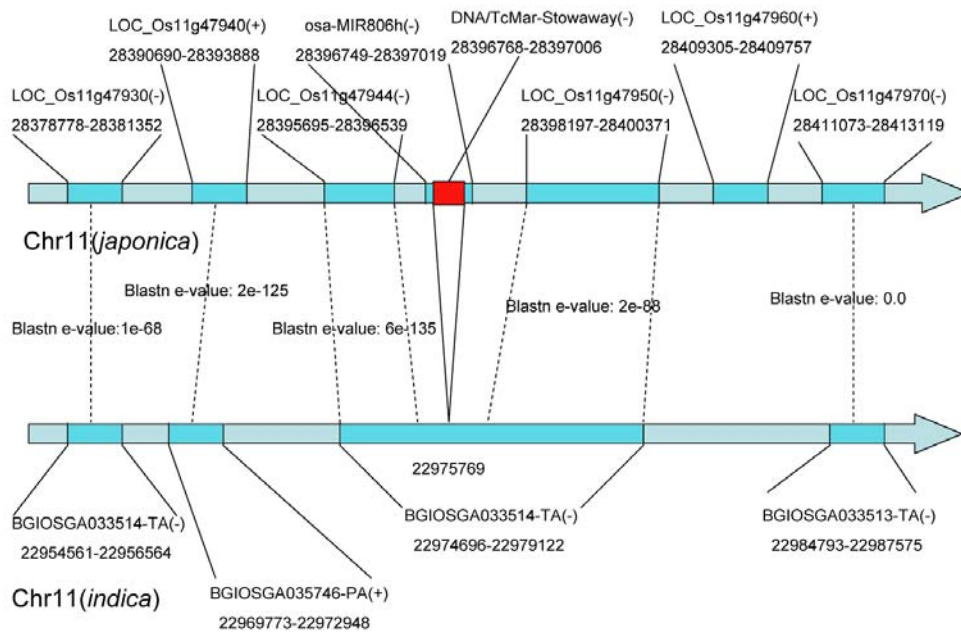

**B**

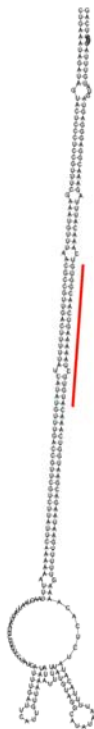

Supplement: pone.0028073.s002.pdf [file pone.0028073.s002.pdf]
